# Supplementary material
Source: PubMed Central journal article supplement (PMC2874069)
Supplement: NIHMS195696-supplement-1.pdf [file NIHMS195696-supplement-1.pdf]

# **Supplementary Information**

**PD-1 regulates germinal center B cell survival and the formation and affinity of long-lived plasma cells**

Kim L. Good-Jacobson<sup>1</sup>, Courtney G. Szumilas<sup>1</sup>, Lieping Chen<sup>2</sup>, Arlene H. Sharpe<sup>3</sup> Mary M. Tomayko<sup>4</sup> & Mark J. Shlomchik<sup>1</sup>

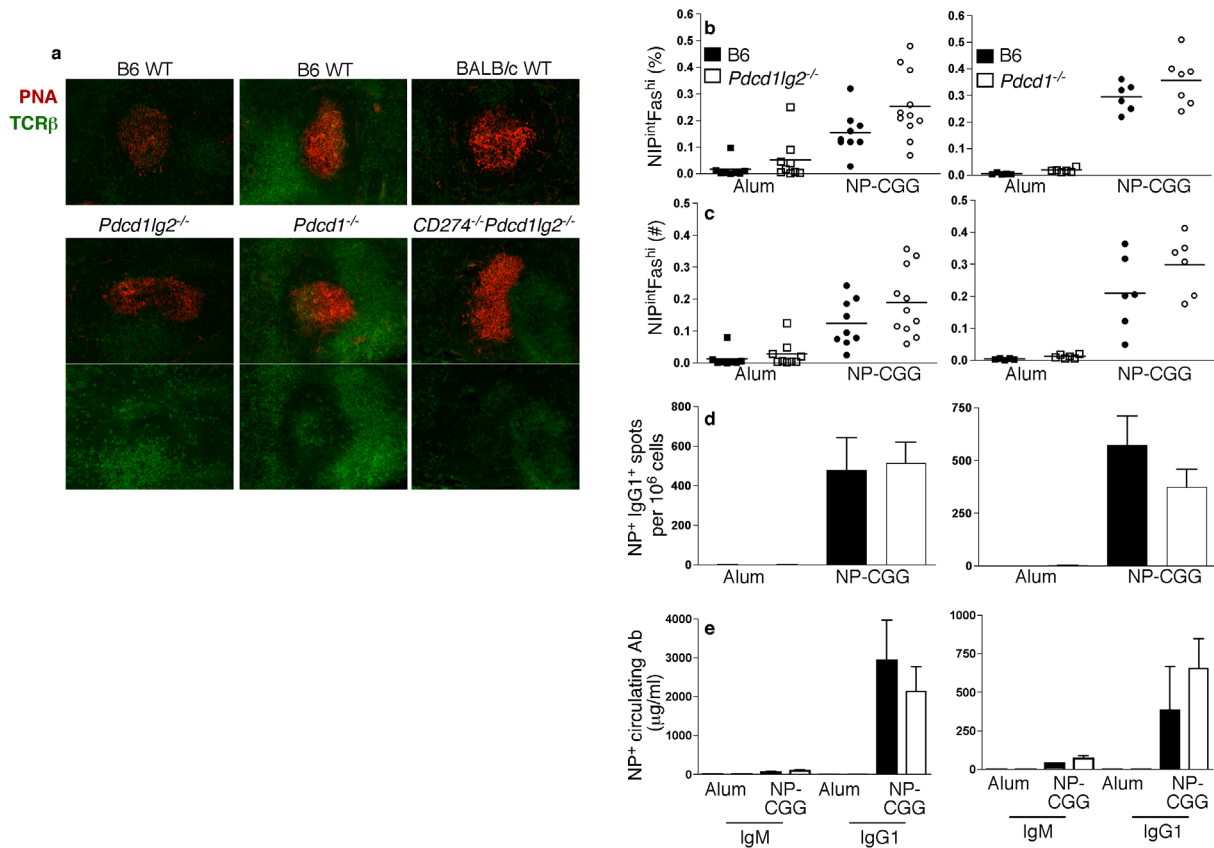

**Supplementary Figure 1: Induction of the GC response and differentiation of  $T_{FH}$  in the absence of PD-1 and its ligands is comparable to WT controls.**

*Pdc1lg2<sup>-/-</sup>*, *Pdc1<sup>-/-</sup>*, *CD274<sup>-/-</sup>Pdc1lg2<sup>-/-</sup>* or WT controls were immunized with NP-CGG in alum (circles;  $n \geq 9$ ) or alum only (squares;  $n \geq 5$ ), and the GC response assessed 12 days post-immunization. (a) Sections of frozen spleens were stained with Abs to TCR $\beta$  (green) and PNA (red). (b,c) Percentages and numbers of splenic B cells (CD19<sup>+</sup>EMA<sup>-</sup>) with a GC phenotype (NIP<sup>int</sup>Fas<sup>hi</sup>) in *Pdc1lg2<sup>-/-</sup>* (b) and *Pdc1<sup>-/-</sup>* (c) mice (open symbols) compared to B6 WT mice (closed symbols) were assessed by flow cytometry. Data are combined from two (b) or three (c) independent experiments. (d,e) NP<sup>+</sup>IgG1<sup>+</sup> Ab-forming cells (d) and circulating IgM and IgG1 Ab (e) in *Pdc1lg2<sup>-/-</sup>* and *Pdc1<sup>-/-</sup>* mice (open bars) compared to B6 controls (black bars). Data are combined from two independent experiments.

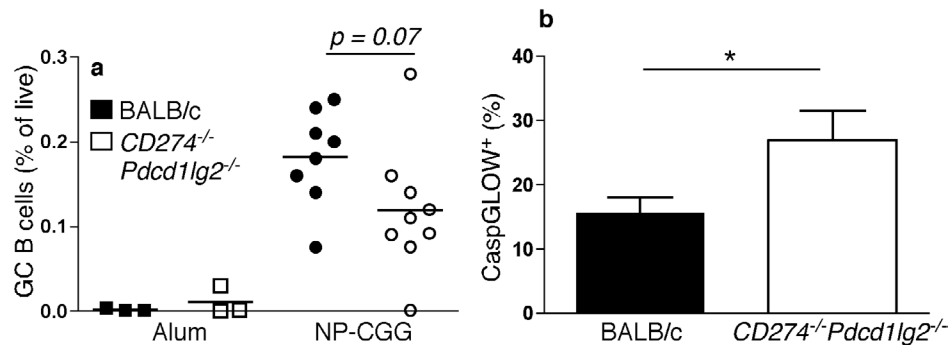

**Supplementary Figure 2: Increased cell death in *CD274*<sup>-/-</sup>*Pdc11g2*<sup>-/-</sup> mice.**

Splenic CD19<sup>+</sup>NIP<sup>int</sup>Fas<sup>hi</sup> cells undergoing cell death were revealed by detection of activated caspases using CaspGLOW immediately after cell harvest at d15. Frequencies of splenic GC B cells (**a**) that are CaspGLOW<sup>+</sup> (**b**;  $n = 8-9$ ). Data are combined from two independent experiments.













```

357 . . . . . GGC TTT . . . . .
358 . . . . . Thr Gly Arg . . . Asp Arg His . . . . . KIJA-KJ123109_C01_011.seq
358 . . . . . ACA GGA CGT . . . GAT AGG CAC . . . . .
358 . . . . . Thr . . . . . Arg Phe . . . . . KIJA-KJ123109_C02_012.seq
358 . . . . . ACA . . . . . CGT TTC . . . . .
356 Val . . . . . Ser . . . . . Met Gly
356 GTG . . . . . TCC . . . . . ATG GGT . . . . .
406 . . . . . Val . . . . . Asn Gly . . . . . Tyr . . . . . KIJA-KJ123109_B02_014_RC.seq
406 . . . . . GTA . . . . . AAT GGT . . . . . TAC . . . . .
406 . . . . . Thr . . . . . Phe His Ser Ser . . . . . Tyr . . . . . KIJA-KJ123109_B04_030_RC.seq
406 . . . . . ACC . . . . . TTC CAT AGT AGC . . . . . TAC . . . . .
404 . . . . . Gly Leu Ala . . . . . Val Tyr . . . . . KIJA-KJ123109_B09_077_RC.seq
404 . . . . . GGA . . . . . CTC GCT . . . . . GTC TAC . . . . .
406 . . . . . Lys . . . . . . . . . . . . . . . KIJA-KJ123109_B10_078_RC.seq
406 . . . . . AAA . . . . . . . . . . . . . . .
406 . . . . . . . . . . . Trp Leu Leu Ser . . . . . . . . . . KIJA-KJ123109_B11_093_RC.seq
406 . . . . . . . . . . . TGG TTA CTT TCT . . . . . . . . . .
407 . . . . . Thr . . . . . Phe His Ser Ser . . . . . Tyr . . . . . KIJA-KJ123109_B12_094_RC.seq
407 . . . . . ACC . . . . . TTC CAT AGT AGC . . . . . TAC . . . . .
356 . . . . . Lys Tyr Ser Ser . . . . . Ser Tyr . . . . . KIJA-112309_H12_082.seq
356 . . . . . AAA . . . . . TAT . . . . . AGT AGT . . . . . TCT TAC . . . . .

```

Gly Thr Thr Leu Thr Lys Gly Glu Phe . . . . . Gln His Thr Gly Gly Arg Tyr . . . . . Trp Ile Arg Ala Arg Tyr Gln Ala . . . . . Majority

```

-----+-----
340 350
-----+-----
336 . . . . . B1-8.seq
336 . . . . .
423 . . . . . ter . . . . . ter KIJA-112309_G05_035.seq
423 . . . . . TAG . . . . . TGA
413 . . . . . ter . . . . . ter KIJA-112309_G06_036.seq
413 . . . . . TAG . . . . . TGA
416 . . . . . ter . . . . . ter KIJA-112309_H01_001.seq
416 . . . . . TAG . . . . . TGA
419 . . . . . ter . . . . . ter KIJA-112309_H02_002.seq
419 . . . . . TAG . . . . . TGA
414 . . . . . ter . . . . . ter KIJA-112309_H03_017.seq
414 . . . . . TAG . . . . . TGA
419 . . . . . ter . . . . . ter KIJA-112309_H04_018.seq
419 . . . . . TAG . . . . . TGA
418 . . . . . Ser . . . . . ter KIJA-112309_H05_033.seq
418 . . . . . AGT . . . . . TAG
422 . . . . . Gly Val Gln Pro . . . . . Gly Gly Cys Trp Asn Arg Asp ??? Arg Cys KIJA-112309_H06_034.seq
422 . . . . . GGC GTC CAA CCT . . . . . GGC GGT TGC TGG AAC CGA GAT NAC CGA TGT TGA
415 . . . . . ter . . . . . ter KIJA-112309_H07_049.seq
415 . . . . . TAG . . . . . TGA
431 . . . . . ter . . . . . ter KIJA-112309_H09_065.seq
431 . . . . . TAG . . . . . TGA
401 . . . . . ter . . . . . ter KIJA-112309_H10_066.seq
401 . . . . . TAG . . . . . TGA
469 . . . . . Cys . . . . . Pro . . . . . H08_RC.seq
469 . . . . . TGC . . . . . CCA . . . . .
416 . . . . . ter . . . . . ter KIJA-KJ123109_C04_028.seq
416 . . . . . TAG . . . . . TGA
425 Pro . . . . . Arg Pro Glu Phe . . . . . Arg Ser Tyr . . . . . Arg ter KIJA-KJ123109_C05_043.seq
425 CCC . . . . . AGG CCT GAA TTC . . . . . AGG AGT TAC . . . . . CGA . . . . .
415 . . . . . ter . . . . . ter KIJA-KJ123109_C06_044.seq
415 . . . . . TAG . . . . . TGA
420 . . . . . ter . . . . . ter KIJA-KJ123109_C07_059.seq
420 . . . . . TAG . . . . . TGA
406 . . . . . ter . . . . . ter KIJA-KJ123109_C08_060.seq
406 . . . . . TAG . . . . . TGA
421 . . . . . ter . . . . . ter KIJA-KJ123109_C09_075.seq
421 . . . . . TAG . . . . . TGA
424 . . . . . Ala . . . . . Ala . . . . . Ala ??? ??? ??? . . . . . KIJA-KJ123109_D02_010_RC.seq
424 . . . . . GCG . . . . . GCC . . . . . GCT ANN NNN NNN . . . . .
413 . . . . . Val . . . . . ter . . . . . KIJA-KJ123109_D04_026_RC.seq
413 . . . . . GTT TAA . . . . .
407 . . . . . Val . . . . . ter . . . . . KIJA-KJ123109_D05_041_RC.seq
407 . . . . . GTT TAA . . . . .
406 . . . . . Val . . . . . ter . . . . . KIJA-KJ123109_D06_042_RC.seq
406 . . . . . GTT TAA . . . . .
413 . . . . . Val . . . . . ter . . . . . KIJA-KJ123109_D07_057_RC.seq
413 . . . . . GTT TAA . . . . .
379 . . . . . Val . . . . . ter . . . . . KIJA-KJ123109_D01_009.seq
379 . . . . . GTT TAA . . . . .
391 . . . . . Ala . . . . . Ala . . . . . Ala Lys Phe Asn . . . . . KIJA-KJ123109_D03_025.seq
391 . . . . . GCG . . . . . GCC . . . . . GCT AAA TTC AAT . . . . .
412 . . . . . Val . . . . . ter . . . . . KIJA-KJ123109_D08_058_RC.seq
412 . . . . . GTT TAA . . . . .
394 . . . . . Val . . . . . ter . . . . . KIJA-KJ123109_D11_089_RC.seq
394 . . . . . GTT TAA . . . . .
395 . . . . . Val . . . . . ter . . . . . KIJA-KJ123109_E02_008_RC.seq
395 . . . . . GTT TAA . . . . .
398 . . . . . Ala . . . . . Ala . . . . . Ala Lys Phe Asn . . . . . KIJA-KJ123109_D09_073.seq
398 . . . . . GCG . . . . . GCC . . . . . GCT AAA TTC AAT . . . . .
393 . . . . . Ala . . . . . Ala . . . . . Ala Lys Phe Asn . . . . . KIJA-KJ123109_D10_074.seq
393 . . . . . GCG . . . . . GCC . . . . . GCT AAA TTC AAT . . . . .
390 . . . . . Ala . . . . . Ala . . . . . Ala Lys Phe Asn . . . . . KIJA-KJ123109_D12_090.seq
390 . . . . . GCG . . . . . GCC . . . . . GCT AAA TTC AAT . . . . .
396 . . . . . Ala . . . . . Ala . . . . . Ala Lys Phe Asn . . . . . KIJA-KJ123109_E01_007.seq
396 . . . . . GCG . . . . . GCC . . . . . GCT AAA TTC AAT . . . . .
419 . . . . . . . . . . . ter . . . . . ter KIJA-KJ123109_A01_015.seq
419 . . . . . . . . . . . TAG . . . . . TGA
415 . . . . . . . . . . . ter . . . . . ter KIJA-KJ123109_A02_016.seq
415 . . . . . . . . . . . TAG . . . . . TGA

```









**Supplemental Figure 3: Vh sequencing of memory B cells.**

Memory B cells were sorted from either B6 (a) or *Pdcd1*<sup>-/-</sup> (b) mice at least 12 wks post-immunization with NP-CGG using the following markers after doublet discrimination: PI<sup>neg</sup>CD19<sup>+</sup>NIP<sup>+</sup>IgG1<sup>+</sup>CD38<sup>+</sup>kappa<sup>lo</sup>. Cell pellets were digested overnight and Vh186.2/JH2 sequences were amplified by nested PCR, cloned and sequenced as described in the methods section. Shown are sequences aligned by the Clustal W method.
